# Supplementary material
Source: publisher figshare collection journal article supplement (https://springernature.figshare.com/ndownloader/files/21323499)
Supplement: Supplementary file 1 [file 21323499]

**Figure S2: Suppressive capacity of PMN-MDSCs and correlation with PMN-MDSC frequencies.**

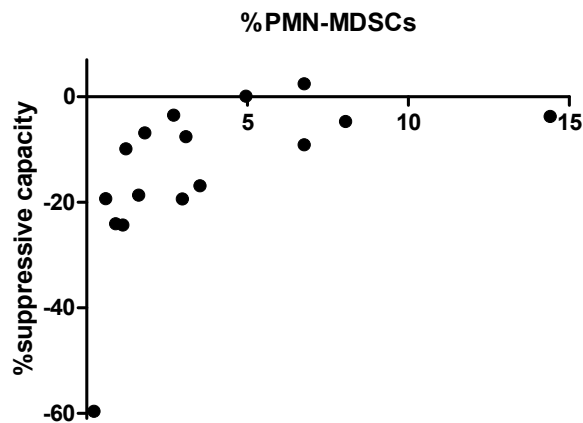

The suppressive capacity of PMN-MDSCs correlates inversely and significantly with the PMN-MDSC frequencies in the combined subgroup of progressors (PR) and patients with lung cancer (BRO) ( $\rho = 0.74$ ,  $p = 0.0010$ ) [PR:  $n = 10$ ; BRO:  $n = 6$ ].

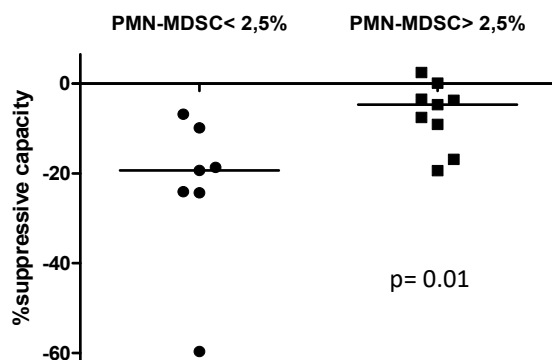

The suppressive capacity is significantly lower in subjects with PMN-MDSC frequencies above 2.5% compared to subjects with frequencies below 2.5% in the combined subgroup PR and BRO ( $p = 0.01$ ) [PR:  $n = 10$ ; BRO:  $n = 6$ ].
